# Supplementary material for: The CHD6 chromatin remodeler is an oxidative DNA damage response factor
Source: PubMed Central journal article supplement (PMC6335469; doi:10.1038/s41467-018-08111-y), 2019-01-16
Supplement: 41467_2018_8111_MOESM1_ESM.pdf [file 41467_2018_8111_MOESM1_ESM.pdf]

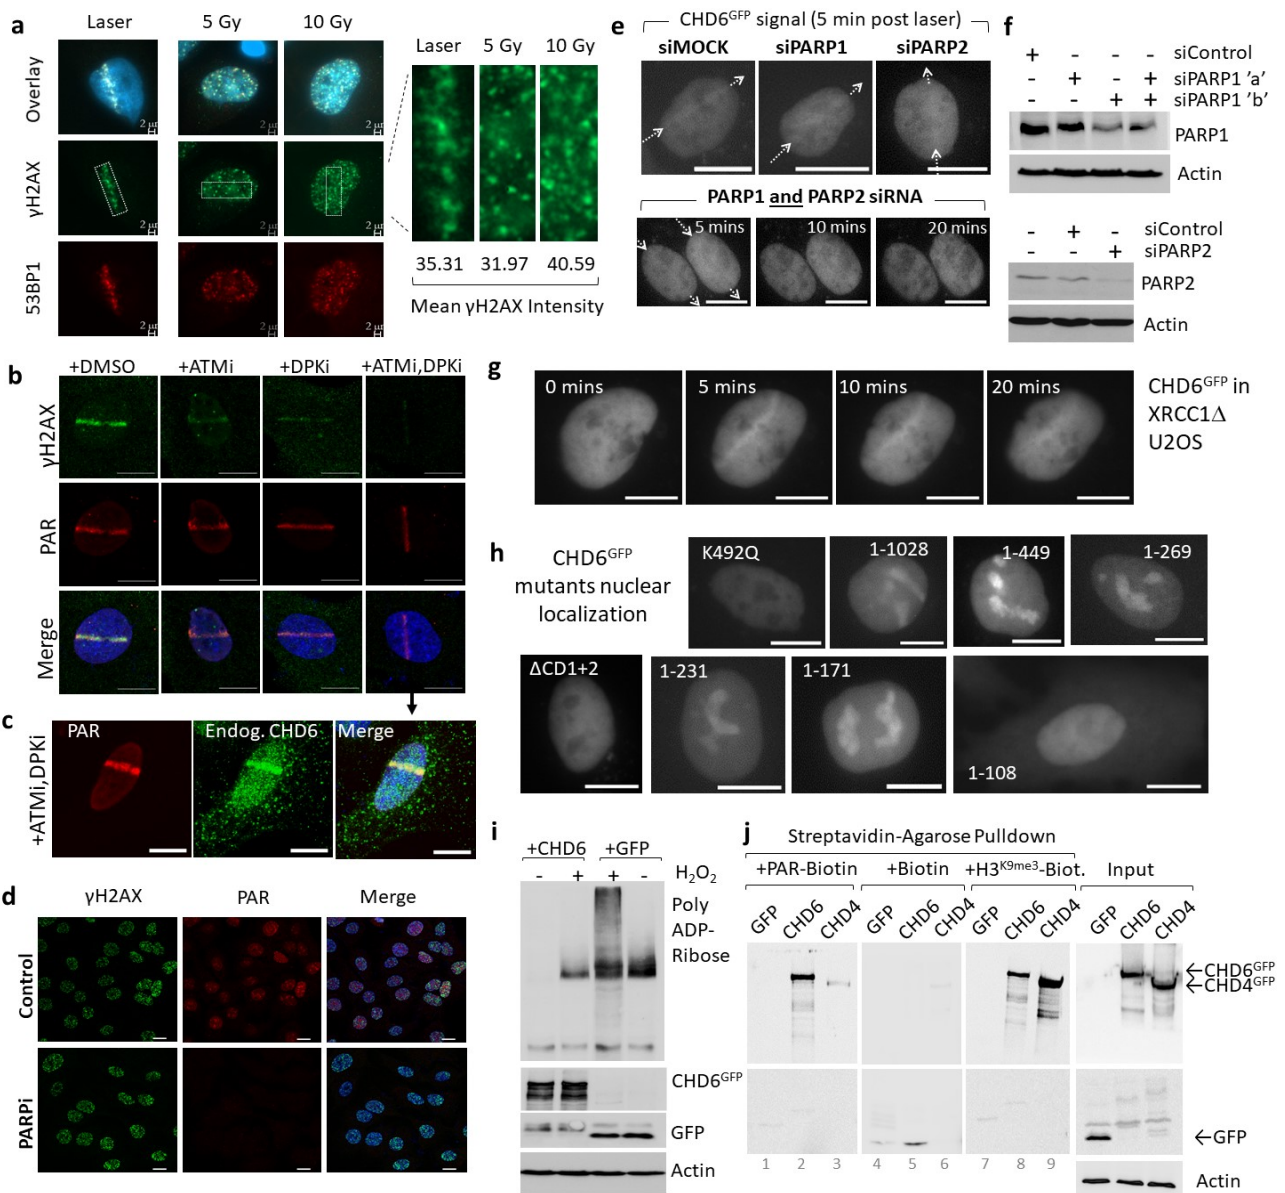

**Supplementary Figure 1: CHD6 dynamically responds to oxidative DNA damage.** A: A549 cells exposed to laser microirradiation or 5 or 10 Gy IR were immunostained for  $\gamma$ H2AX (green) or 53BP1 (red) and DAPI (blue, in overlay).  $\gamma$ H2AX intensity per area was quantified. Scale bars = 2  $\mu$ M. B: A549 cells were treated with ATM and/or DNA-PKcs inhibitors for 1 h before being subjected to microirradiation, fixed 5 min later and immunostained for endogenous  $\gamma$ H2AX (green) and PAR (red). Overlay includes DAPI (blue). Scale bars = 10  $\mu$ M. C: Cells from (B) were also stained for endogenous CHD6 (green) and PAR (red). Scale bars = 10  $\mu$ M. D: A549 were treated with 5 Gy IR  $\pm$  PARPi and immunostained as in (B). Scale bars = 20  $\mu$ M. E: Representative images of data in Fig 3c. Scale bars = 10  $\mu$ M. F: A549 cells transfected with siRNA targeting indicated proteins (used in Fig 3) were immunoblotted to confirm protein knockdown. G: U2OS cells deleted for XRCC1 and transfected with CHD6<sup>GFP</sup> were subjected to laser microirradiation and live imaged over 20 min. Scale bars = 10  $\mu$ M. H: Live imaging stills of GFP signal from A549 cells transfected with indicated GFP-tagged CHD6 constructs indicating nuclear localization. Some nucleolar accumulation is observed for truncation mutants. Only once the extreme N-terminus is perturbed (aa1-108) does CHD6 become

partially cytoplasmic. Scale bars = 10  $\mu$ M. I: Extracts from HEK293 transfected with GFP or GFP-tagged CHD6 or CHD4 were incubated with streptavidin-agarose beads loaded with biotin alone, biotin-PARG or biotin-H3<sup>K9me3</sup>. Washed pull-downs were immunoblotted for indicated proteins. J: HEK293 cells were transfected with GFP or GFP-tagged CHD6 add, 16 h later, treated with 5  $\mu$ M PARGi for 0.5h before the addition of 1 mM H<sub>2</sub>O<sub>2</sub> for 1h. Whole cell extracts were immunoblotted for the indicated proteins. Representative blot shown, n=3.

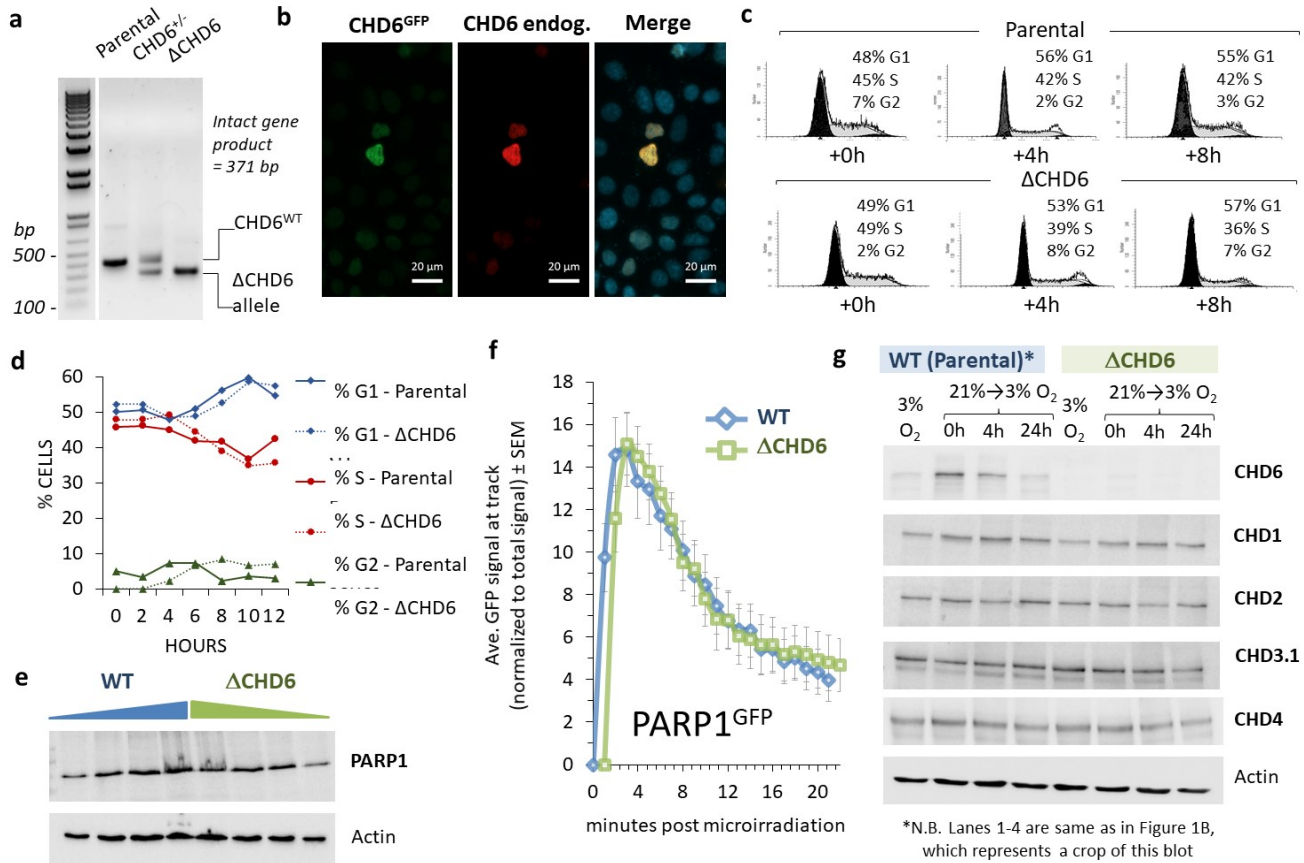

**Supplementary Figure 2: Phenotypes of CHD6 ablated cells.** A: Genomic DNA was isolated from wildtype 'parental' A549 cells and two single-cell cloned lines subjected to CRISPR-based gene editing to delete CHD6. The CHD6 cDNA was then analyzed by PCR to confirm presence of intended mutation, with the intact (wildtype) gene product predicted to be 371 bp and the product from the edited gene to be 100 nt smaller. B:  $\Delta$ CHD6 A549 cells were transfected with CHD6<sup>GFP</sup> (green) and immunostained for endogenous CHD6 (red). Scale bars = 20  $\mu$ M. C-D: Fluorescence Activated Cell Sorting (FACS) based on DNA content was used to determine relative cell cycle phase distribution of the parental and  $\Delta$ CHD6 cells over a 12h period. E: Increasing amounts (5, 10, 25, 50  $\mu$ g) of whole cell extract from wildtype and  $\Delta$ CHD6 A549 were immunoblotted for PARP1 and actin as indicated. F: GFP-tagged PARP1 was transfected into wildtype and  $\Delta$ CHD6 A549 and subjected to laser microirradiation and live cell imaging. Data is plotted as in Fig 3. Error bars represent s.e.m, n=20. There is no significant difference between wildtype and CHD6-deleted cells. G: Wildtype and  $\Delta$ CHD6 A549 were treated as in Fig 1A and immunoblotted for CHD1, CHD2, CHD3.1, CHD4 or CHD6 and actin. This blot represents the uncropped version of Fig 1b. In all cases, blue represents Parental WT A549s and green represents  $\Delta$ CHD6 A549s.

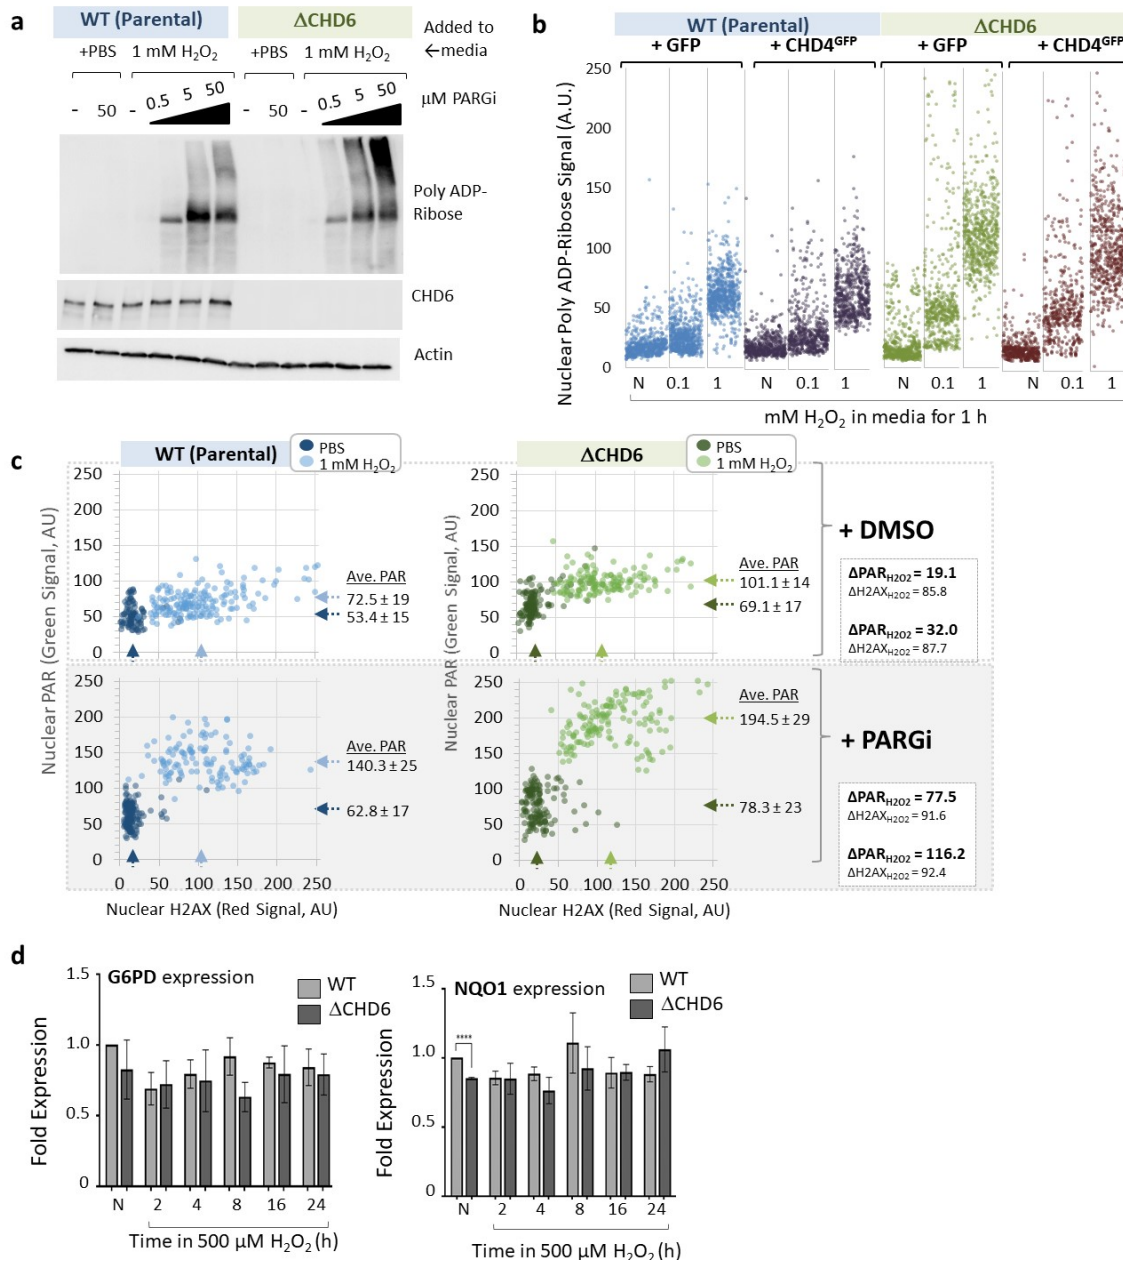

**Supplementary Figure 3: Phenotypes of CHD6 ablated cells continued.** A: WT and  $\Delta$ CHD6 A549 cells were treated  $\pm$  1 mM H<sub>2</sub>O<sub>2</sub> in media and indicated doses of PARGi for 1 h before being immunoblotted for Poly ADP-Ribose (PAR), CHD6 and Actin. B: WT (blue, purple dots) and  $\Delta$ CHD6 (green, red dots) A549 cells were transfected with GFP or CHD4<sup>GFP</sup> before being treated with 5  $\mu$ M PARGi and 0, 0.1, 1 mM H<sub>2</sub>O<sub>2</sub> in media for 1 h and immunostained for Poly ADP-Ribose (PAR) and GFP. PAR signal in 300-400 (per experiment, n=3) GFP-positive cells was quantified by ImageJ. Purple represents WT A549s transfected with CHD4<sup>GFP</sup> and red represents  $\Delta$ CHD6 A549s transfected with CHD4<sup>GFP</sup>. C: WT and A549 $\Delta$ CHD6 were treated with either DMSO or 5  $\mu$ M PARGi  $\pm$  1 mM H<sub>2</sub>O<sub>2</sub> for 1 h, immunostained for PAR and  $\gamma$ H2AX and quantified by ImageJ. Nuclear PAR in >1,000 GFP-positive cells was quantified by ImageJ, n=3. D: WT (light grey) and  $\Delta$ CHD6 (dark grey) A549 cells were exposed to 0 or 500  $\mu$ M H<sub>2</sub>O<sub>2</sub> in media for 1 day, before extraction and analysis by quantitative PCR to ascertain NQO1, G6PD and TBP mRNA expression. Error bars represent s.e.m, n=3. Students unpaired t-test, \*\*\*\*= p<0.0001. In all cases, blue represents Parental WT A549s and green represents  $\Delta$ CHD6 A549s.

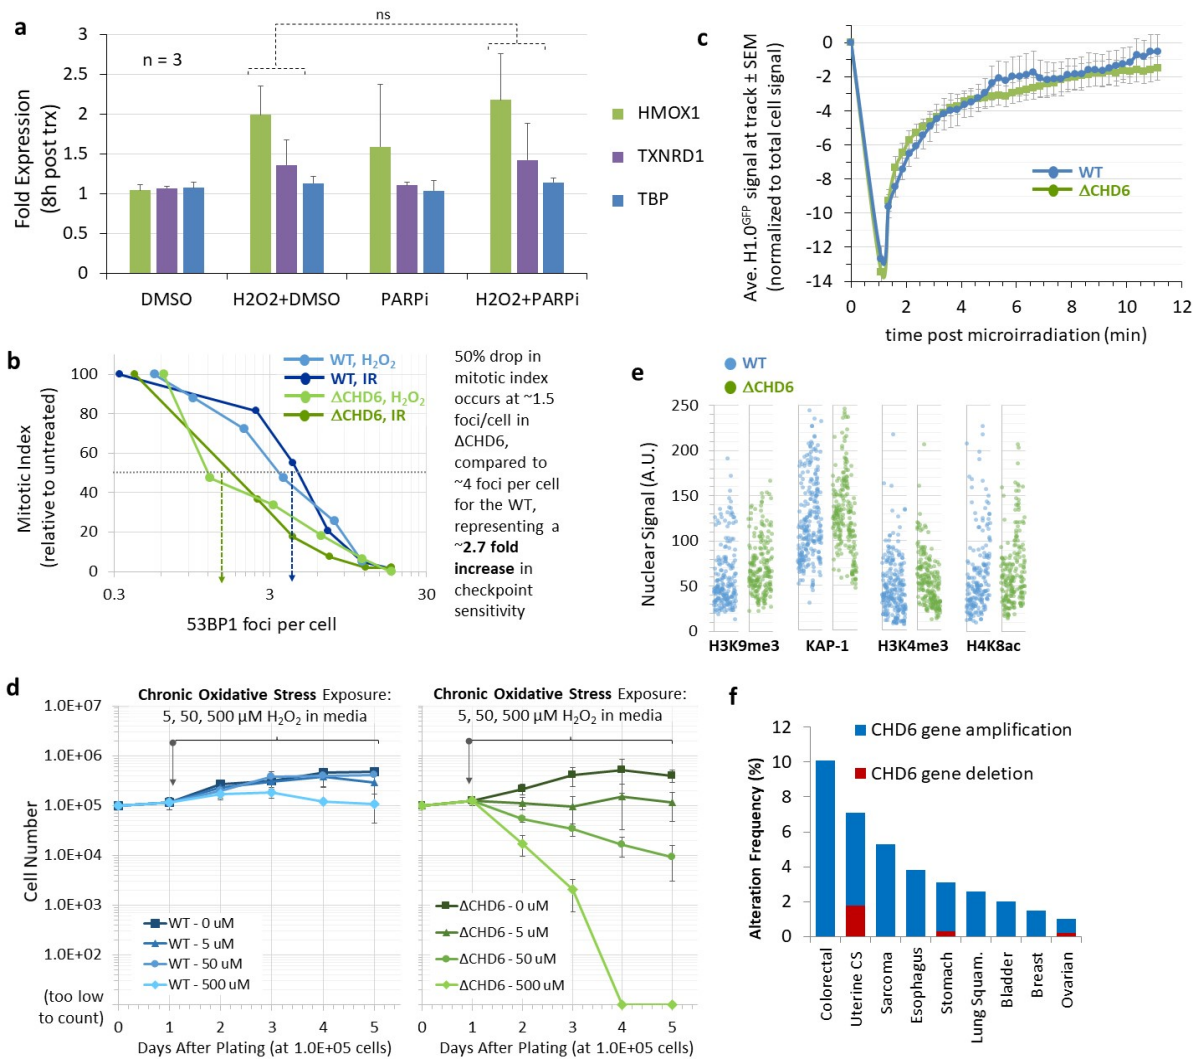

**Supplementary Figure 4: Phenotypes of CHD6 ablated cells continued.** A: A549 cells were exposed to 0 or 500  $\mu\text{M}$   $\text{H}_2\text{O}_2$  in media for 1 day in the presence or absence of PARPi, before extraction and analysis by quantitative PCR to ascertain HMOX1, TXNRD1 and TBP mRNA expression. Errors bars represent s.e.m,  $n=3$ , ns = not significant. B: The data in Fig 5A were re-expressed as mitotic index relative to 53BP1 foci number. Arrows denote the foci number at which a 50% reduction in mitotic index is observed. C: A549 cells were transfected with Histone H1.0<sup>GFP</sup> plasmids and labelled with BrdU; 16 h later, cells were subjected to laser microirradiation and live imaged over 11 min. GFP signal at microirradiation track was quantified as described in the methods. Error bars represent s.e.m,  $n=10$ . D: Cells were cultured at 5%  $\text{O}_2$ . Exactly  $1.0\text{E}+05$  WT (blue lines) and  $\Delta\text{CHD6}$  (green lines) A549 cells were plated and, 1 day later, 0, 50 or 500  $\mu\text{M}$   $\text{H}_2\text{O}_2$  was added to media. Fresh  $\text{H}_2\text{O}_2$  was added to media every day to maintain chronic exposure. Viable cell numbers were counted daily using a Moxi-Z cell counter. Error bars represent s.e.m,  $n=3$ . E: WT (blue) and  $\Delta\text{CHD6}$  (green) cells were immunostained for the indicated antibodies and quantified by ImageJ,  $n=3$ . F: % gene alteration frequency, showing only gene amplification (blue) or deletion (red), for nine human cancers (data derived and adapted from The Cancer Genome Atlas datasets available at cbioportal.org). In all cases, blue represents Parental WT A549s and green represents  $\Delta\text{CHD6}$  A549s.

**a** (Figure 1A) – film imaging

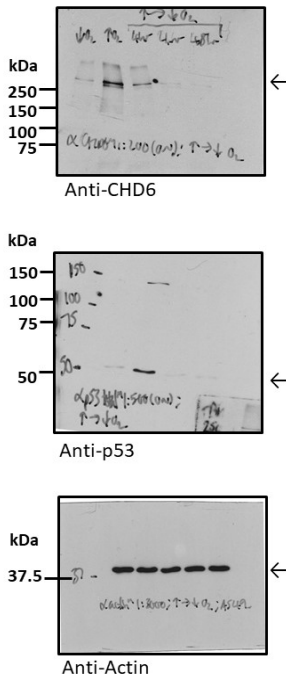

**b** (Figure 1B, Suppl. Figure 2G) – Digital (Chemidoc) Imaging

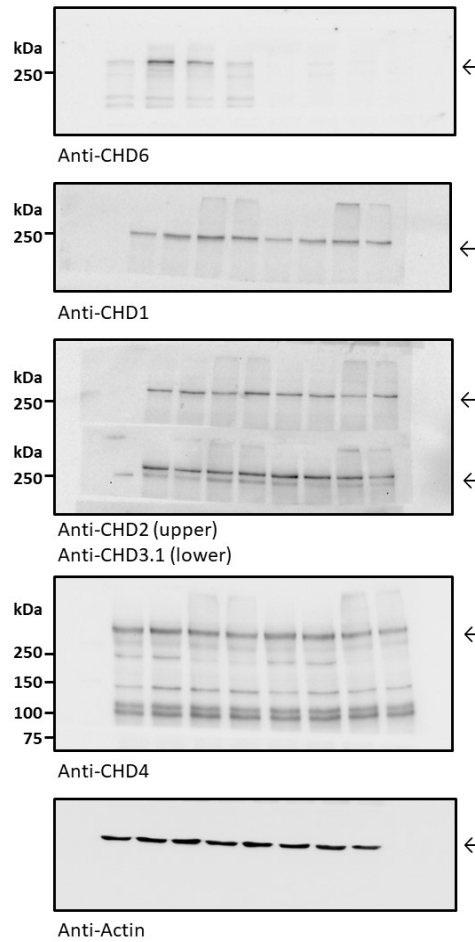

**c** (Figure 1E) – Film Imaging

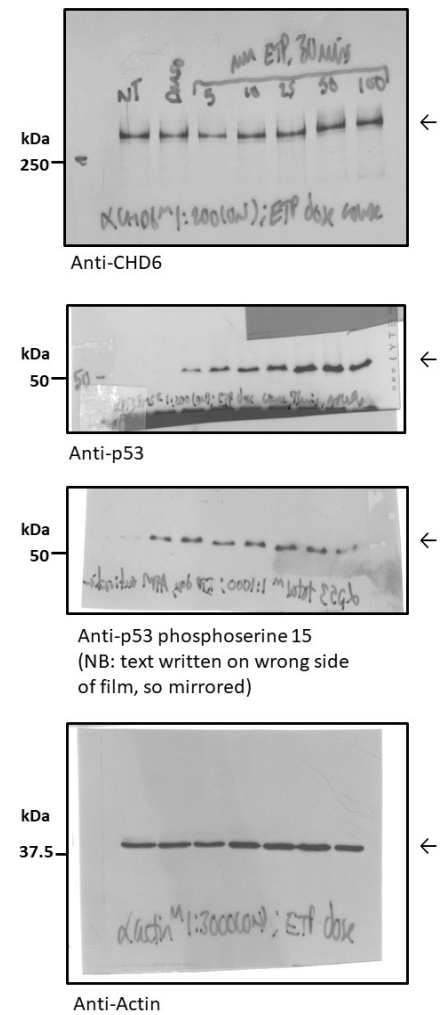

**Supplementary Figure 5: Full-size scans of immunoblots.** A-C: Uncropped blots for indicated figures. Images based on scans of developed film, versus digital files from ChemiDoc imaging, are indicated.

**a** (Figure 1F) – film imaging

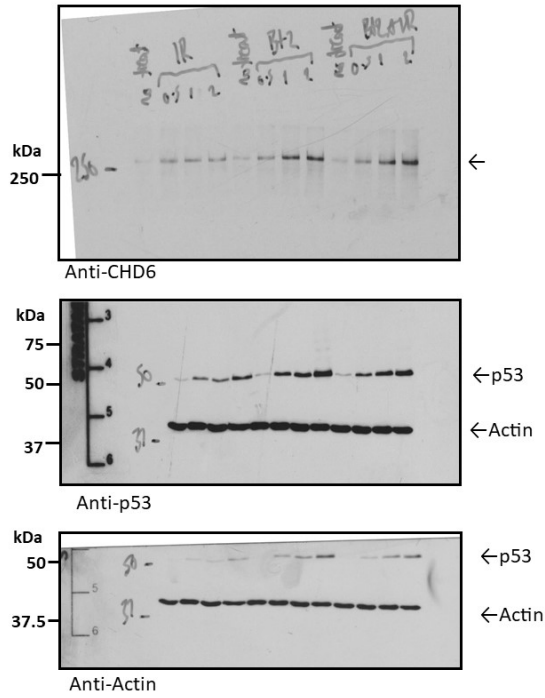

**b** (Figure 1G) – Digital (Chemidoc) Imaging

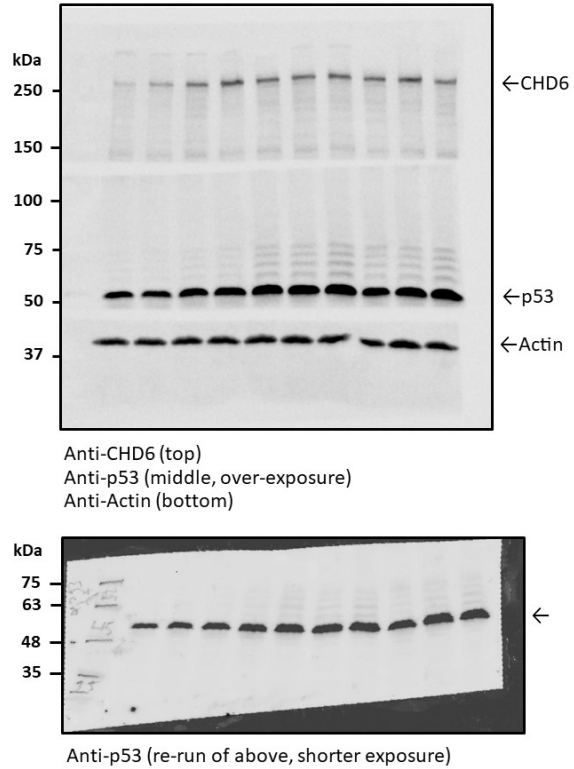

**c** (Figure 4A) – film imaging. Only first three lanes are relevant.

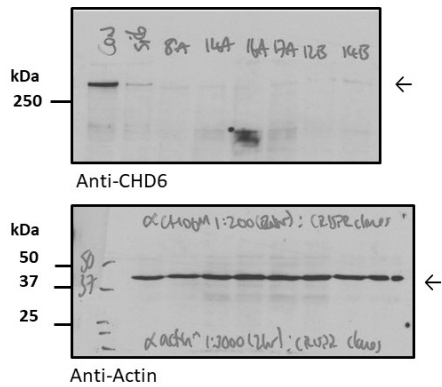

**Supplementary Figure 6: Full-size scans of immunoblots.** A-C: Uncropped blots for indicated figures. Images based on scans of developed film, versus digital files from ChemiDoc imaging, are indicated.

**a** (Figure 4B) – Digital (Chemidoc) Imaging

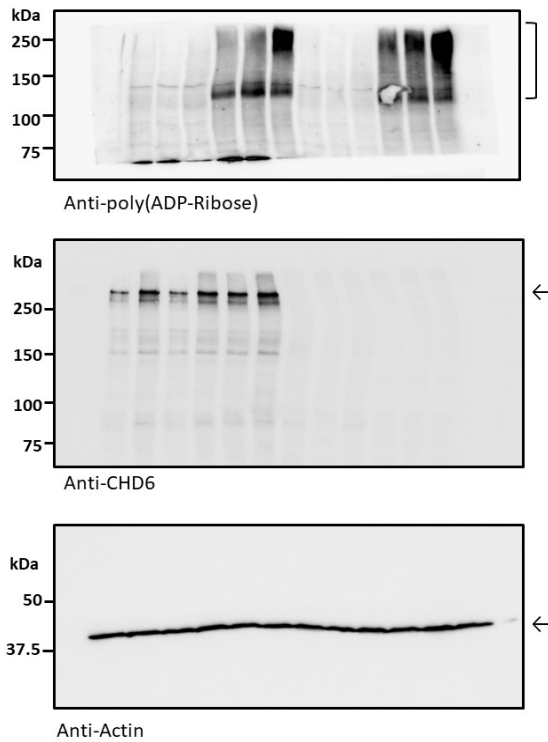

**b** (Figure 5H) – Digital (Chemidoc) Imaging

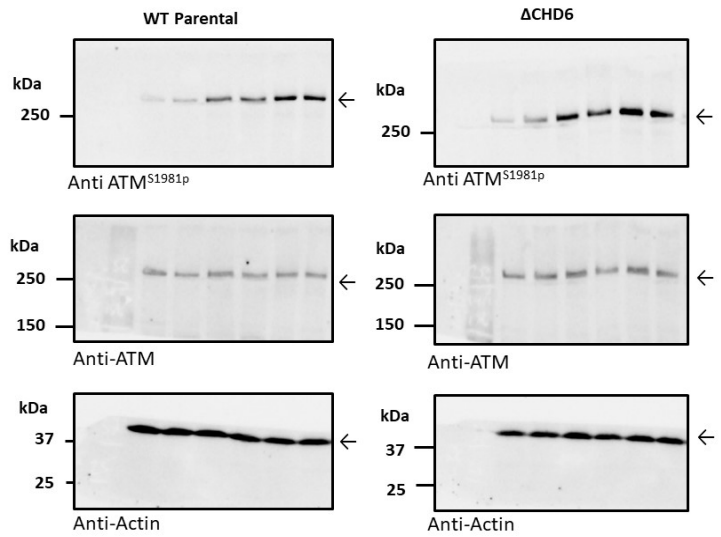

**Supplementary Figure 7: Full-size scans of immunoblots.** A-B: Uncropped blots for indicated figures. Images based on scans of developed film, versus digital files from ChemiDoc imaging, are indicated.

**a (Figure 4E) – FACS sorting protocol and gating**

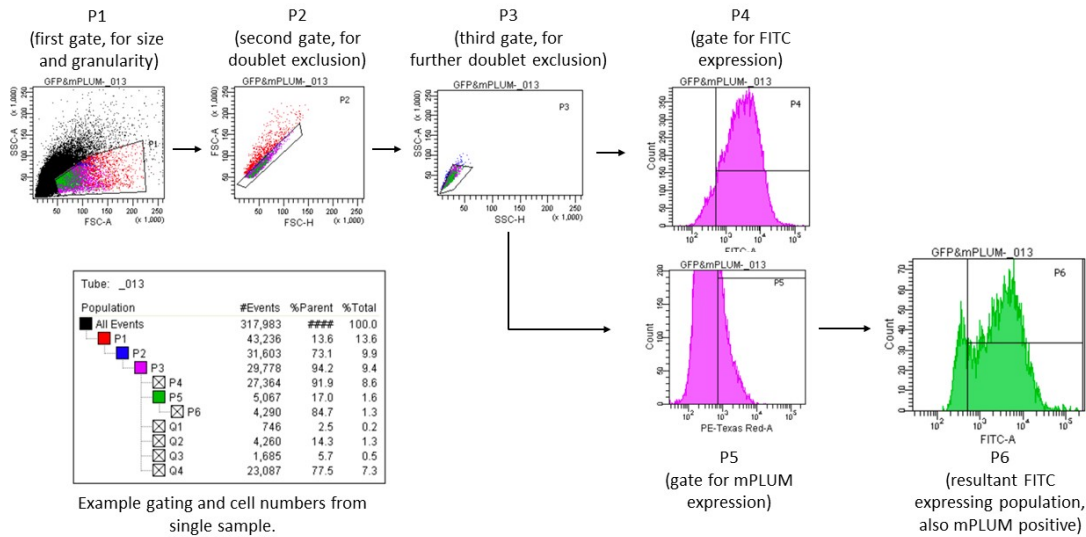

**b (Figure 5G) – FACS sorting protocol and gating**

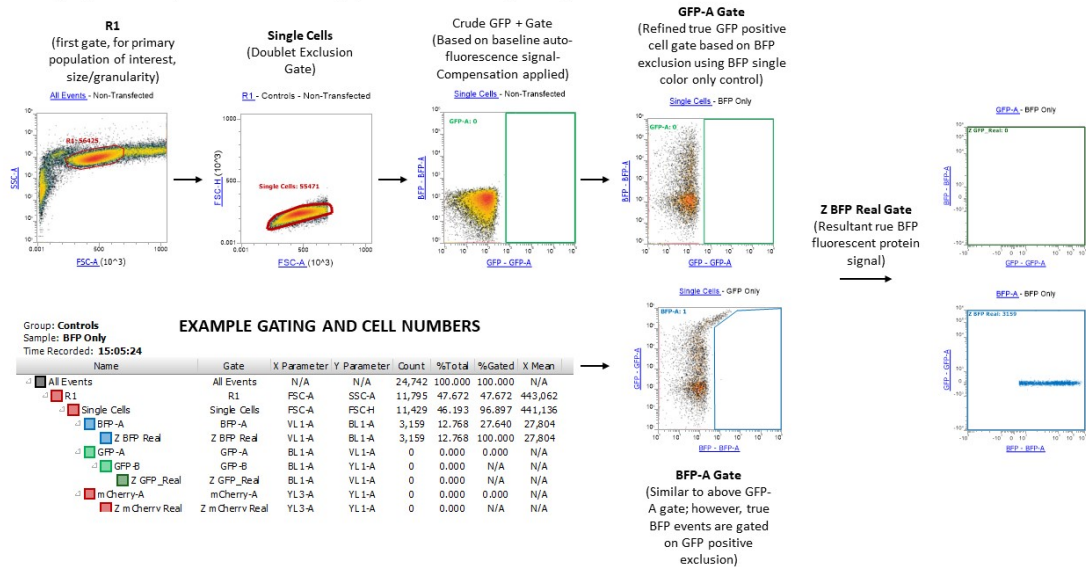

**Supplementary Figure 8: Gating and Protocol of FACS analysis.** A: Additional FACS sorting methodology for data described in Figure 4e. Panel B: Additional FACS sorting methodology for data described in Figure 5g.



**Supplementary Table 1: Statistic analysis of laser microirradiation data.** Corresponding to CHD6 truncation mutants in Fig 3e, indicating 2-way ANOVAs comparing entire curves, then specific comparison of data at selected time points across distinct periods within the kinetics of CHD6 recruitment and dispersal (values mean the following: ns =  $p > 0.05$  ; \* $p < 0.05$ ; \*\* $p < 0.01$ ; \*\*\* $p < 0.001$ ; \*\*\*\* $p < 0.0001$ ). 4 minutes correlates with the end of the early, PAR-dependent recruitment. 8 min correlates with end of the slower period of recruitment, and maximum signal reached. 14 min represents the period of stable retention, whilst 21 min represents the period of significant dispersal.

| Comparison          | Two-way Anova | 4 min | 8 min | 14 min | 21 min |
|---------------------|---------------|-------|-------|--------|--------|
| WT v PARPi          | ****          | ****  | ****  | ****   | ns     |
| WT v PARGi          | ****          | ns    | *     | ****   | ****   |
| siScr v siPARP1+2   | ****          | ****  | ***   | ns     | ns     |
| siScr v siPARG      | ****          | ns    | ns    | ns     | ns     |
| WT v K492Q          | ns            | ns    | ns    | ns     | ns     |
| WT v $\Delta$ CD1+2 | ns            | ns    | ns    | ns     | ns     |
| WT v 1-1448         | ns            | ns    | ns    | ns     | ns     |
| WT v 1-1028         | ns            | ns    | ns    | ns     | ns     |
| WT v 1-449          | ****          | ns    | ns    | ns     | ns     |
| WT v 1-269          | ****          | ns    | ***   | *      | ns     |
| WT v 1-231          | ****          | ns    | **    | **     | ns     |
| WT v 1-171          | ****          | ****  | ****  | ****   | **     |
| PARPi v 1-171       | ns            | ns    | ns    | ns     | ns     |

**Supplementary Table 2: Primary antibodies used in this study.**

| <b>Antibody</b> | <b>Host</b> | <b>Company (reference #)</b>      | <b>IF</b> | <b>IB</b> |
|-----------------|-------------|-----------------------------------|-----------|-----------|
| 53BP1           | Rabbit      | Abcam, ab21083                    | 1:800     |           |
| GFP             | Rabbit      | Abcam, ab290                      |           | 1:500     |
| CHD6            | Mouse       | Abcam, ab51330                    |           | 1:200     |
| CHD3            | Rabbit      | Abcam, ab84528                    |           | 1:500     |
| CHD4            | Mouse       | Abcam, ab54603                    |           | 1:400     |
| p53             | Mouse       | Calbiochem, OP43                  |           | 1:800     |
| Actin           | Mouse       | Abcam, ab3280                     |           | 1:300     |
| ATMS1981p       | Rabbit      | Abcam, ab 81292                   |           | 1:2000    |
| H3S10p          | Mouse       | Abcam, ab 14955                   | 1:200     |           |
| XRCC1           | Rabbit      | Abcam, ab47920                    | 1:2000    |           |
| PAR             | Rabbit      | Trevigen, 4336-PBC-100            | 1:400     | 1:1000    |
| CHD1            | Mouse       | Santa Cruz, sc-271626             |           | 1:500     |
| PARP1           | Rabbit      | ENZO, ALX-210-302                 |           | 1:1000    |
| PARP2           | Mouse       | ENZO, ALX-804-639                 |           | 1:500     |
| XRCC4           | Rabbit      | Gift from Dr. Modesti             | 1:500     |           |
| $\gamma$ H2AX   | Mouse       | Millipore, clone JBW301           | 1:2000    |           |
| CHD2            | Rat         | Millipore, MAB E873               |           | 1:500     |
| ATM             | Rabbit      | Clone ATM4BA (Klement et al 2014) |           | 1:2000    |
| CHD6            | Mouse       | LSBio, LSC342418                  | 1:50      |           |
| KAP-1           | Rabbit      | Abcam, ab10584                    | 1:800     |           |
| $\gamma$ H2AX   | Mouse       | Abcam, ab26350                    | 1:800     |           |

**Supplementary Table 3: siRNA sequences.**

| siRNA       | Sequence (5'-3')          | coding region targetted (nt) |
|-------------|---------------------------|------------------------------|
| siScrambled | CGGCAUCAAGAGUACGCAAAGAGUA | na                           |
| siCHD6 A    | GGACAGAGAUGAAUGCCAUUGUGUA | 1531-1556                    |
| siCHD6 B    | CAGACCGCUUUGUCUUCUUCUGUG  | 2548-2573                    |
| siPARP1 A   | AAGAAAGUGUGUUCAACUAAUGACC | 928-952                      |
| siPARP1 B   | UUAAGAUAGAGCGUGAAGGCGAAUG | 2681-2706                    |
| siPARP2     | CGAAGGAUUGCUUCAAGGUAAUUAC | 1543-1567                    |
| siPARG A    | UUACCAGUUGGAUGGACACUAAAGG | 316-340                      |
| siPARG B    | GAAGAUGGUAGUUCUCCCAAACAG  | 1067-1092                    |
| siXRCC1 A   | GGAGACCAUCUCUGUGGUCCUACAG | 240-265                      |
| siXRCC1 B   | AACCCGGUCACUCAUAGUCCUCG   | 1839-1864                    |
| siCHD3 A    | GGGCAUCAUUCGUGAGAAUGAAUU  | 2618-2643                    |
| siCHD3 B    | AGGCACAGGUGAAGUCCAUGUUCU  | 2699-2724                    |

**Supplementary Table 4: GFP-tagged CHD6 plasmid mutations.**

| GFP mutant | Amino Acid position(s)            | Nucleotide position(s)                    | Codon change                          |
|------------|-----------------------------------|-------------------------------------------|---------------------------------------|
| K492Q      | K492>Q                            | 1471-1475                                 | AAA>CAA                               |
| ΔCD1+2     | F318>A, Y322>A,<br>Y398>A, W402>A | 352-354, 364-366,<br>1191-1193, 1204-1206 | TTC>GCC, TAT>GCT,<br>TAC>GCC, TGG>GCG |
| 1-1448     |                                   | 4044-4046                                 | TGT>TAG                               |
| 1-1028     |                                   | 3085-3087                                 | ATA>TAG                               |
| 1-449      |                                   | 1347-1349                                 | GAG>TGA                               |
| 1-269      |                                   | 807-809                                   | CGA>TAG                               |
| 1-231      |                                   | 693-695                                   | GAC>TAG                               |
| 1-171      |                                   | 513-515                                   | TCG>TAG                               |
| 1-108      |                                   | 355-357                                   | AAG>TAG                               |

**Supplementary Table 5: Primer sequences for qPCR analysis.**

| Target | Forward primer 5'-3'   | Reverse primer 5'-3'      |
|--------|------------------------|---------------------------|
| NQO1   | TGAAGAAGAAAGGATGGGAGGT | GGCCTTCTTTATAAGCCAGAACA   |
| HMOX1  | TGCTGACCCATGACACCAAG   | GGGCAGAATCTTGCACTTTGTT    |
| TXRND1 | CCAGGCCGACTCAGAGTAG    | GCCAGCATCACCGTATTATATTCTC |
| G6PD   | CCCGGAAACGGTCGTACACT   | CATGACGCTGTCTGCGCTTC      |
| GSTM2  | CCTTCCCAAACCTGAAGGA    | TTCAAGGCCCTACTTGTTGC      |
| GPX2   | TTTCAATACGTTCCGGGGCA   | TCTGACAGTTCTCCTGATGTCC    |
| GAPDH  | GAAGGTCGGAGTCAACGGATTT | ATGGGTGGAATCATATTGGAAC    |
| TBP    | CGCCAGCTTCGGAGAGTTC    | ACAACCAAGATTCCTGTGGATACA  |

**Supplementary Table 6: DNA lesions used in multiplexed DNA repair assay.**

| <b>Repair Pathway (lesion)</b>                 | <b>Lesion-Containing Reporter (REF)</b> | <b>Undamaged Control</b> |
|------------------------------------------------|-----------------------------------------|--------------------------|
| NHEJ (ScaI-induced DSB)                        | BFP_NHEJ <sup>1</sup>                   | pmax_BFP                 |
| HR (StuI-Induced DSB)                          | D5GFP_StuI_Linear <sup>1,2</sup>        | pCX-NNX-GFP              |
| NER (800 J/m <sup>2</sup> UVC-Induced Lesions) | mOrange_UV <sup>1</sup>                 | pmax_mOrange             |
| MMR (G:G mismatch)                             | mOrange_GG <sup>1</sup>                 | pmax_mOrange             |
| BER (Tetrahydrofuran)                          | GFP_THF <sup>3</sup>                    | pmax_GFP                 |

## **SUPPLEMENTARY REFERENCES**

1. Nagel, ZD et al. Multiplexed DNA repair assays for multiple lesions and multiple doses via transcription inhibition and transcriptional mutagenesis. *Proc Natl Acad Sci U S A* **111**, E1823-32 (2014).
2. Kiziltepe, T et al. Delineation of the chemical pathways underlying nitric oxide-induced homologous recombination in mammalian cells. *Chemistry & Biology* **12**, 357-369 (2005).
3. Chaim, IA et al. In vivo measurements of interindividual differences in DNA glycosylases and APE1 activities. *Proc Natl Acad Sci U S A* **114**, E10379-E10388 (2017).
